# Supplementary material
Source: publisher site journal article supplement (https://www.dovepress.com/article/569177)

### Supplemental Figure S1. Schematic Overview of the Study Workflow.

A flow diagram summarizing the integrated multi-omics and functional validation approach used in this study.

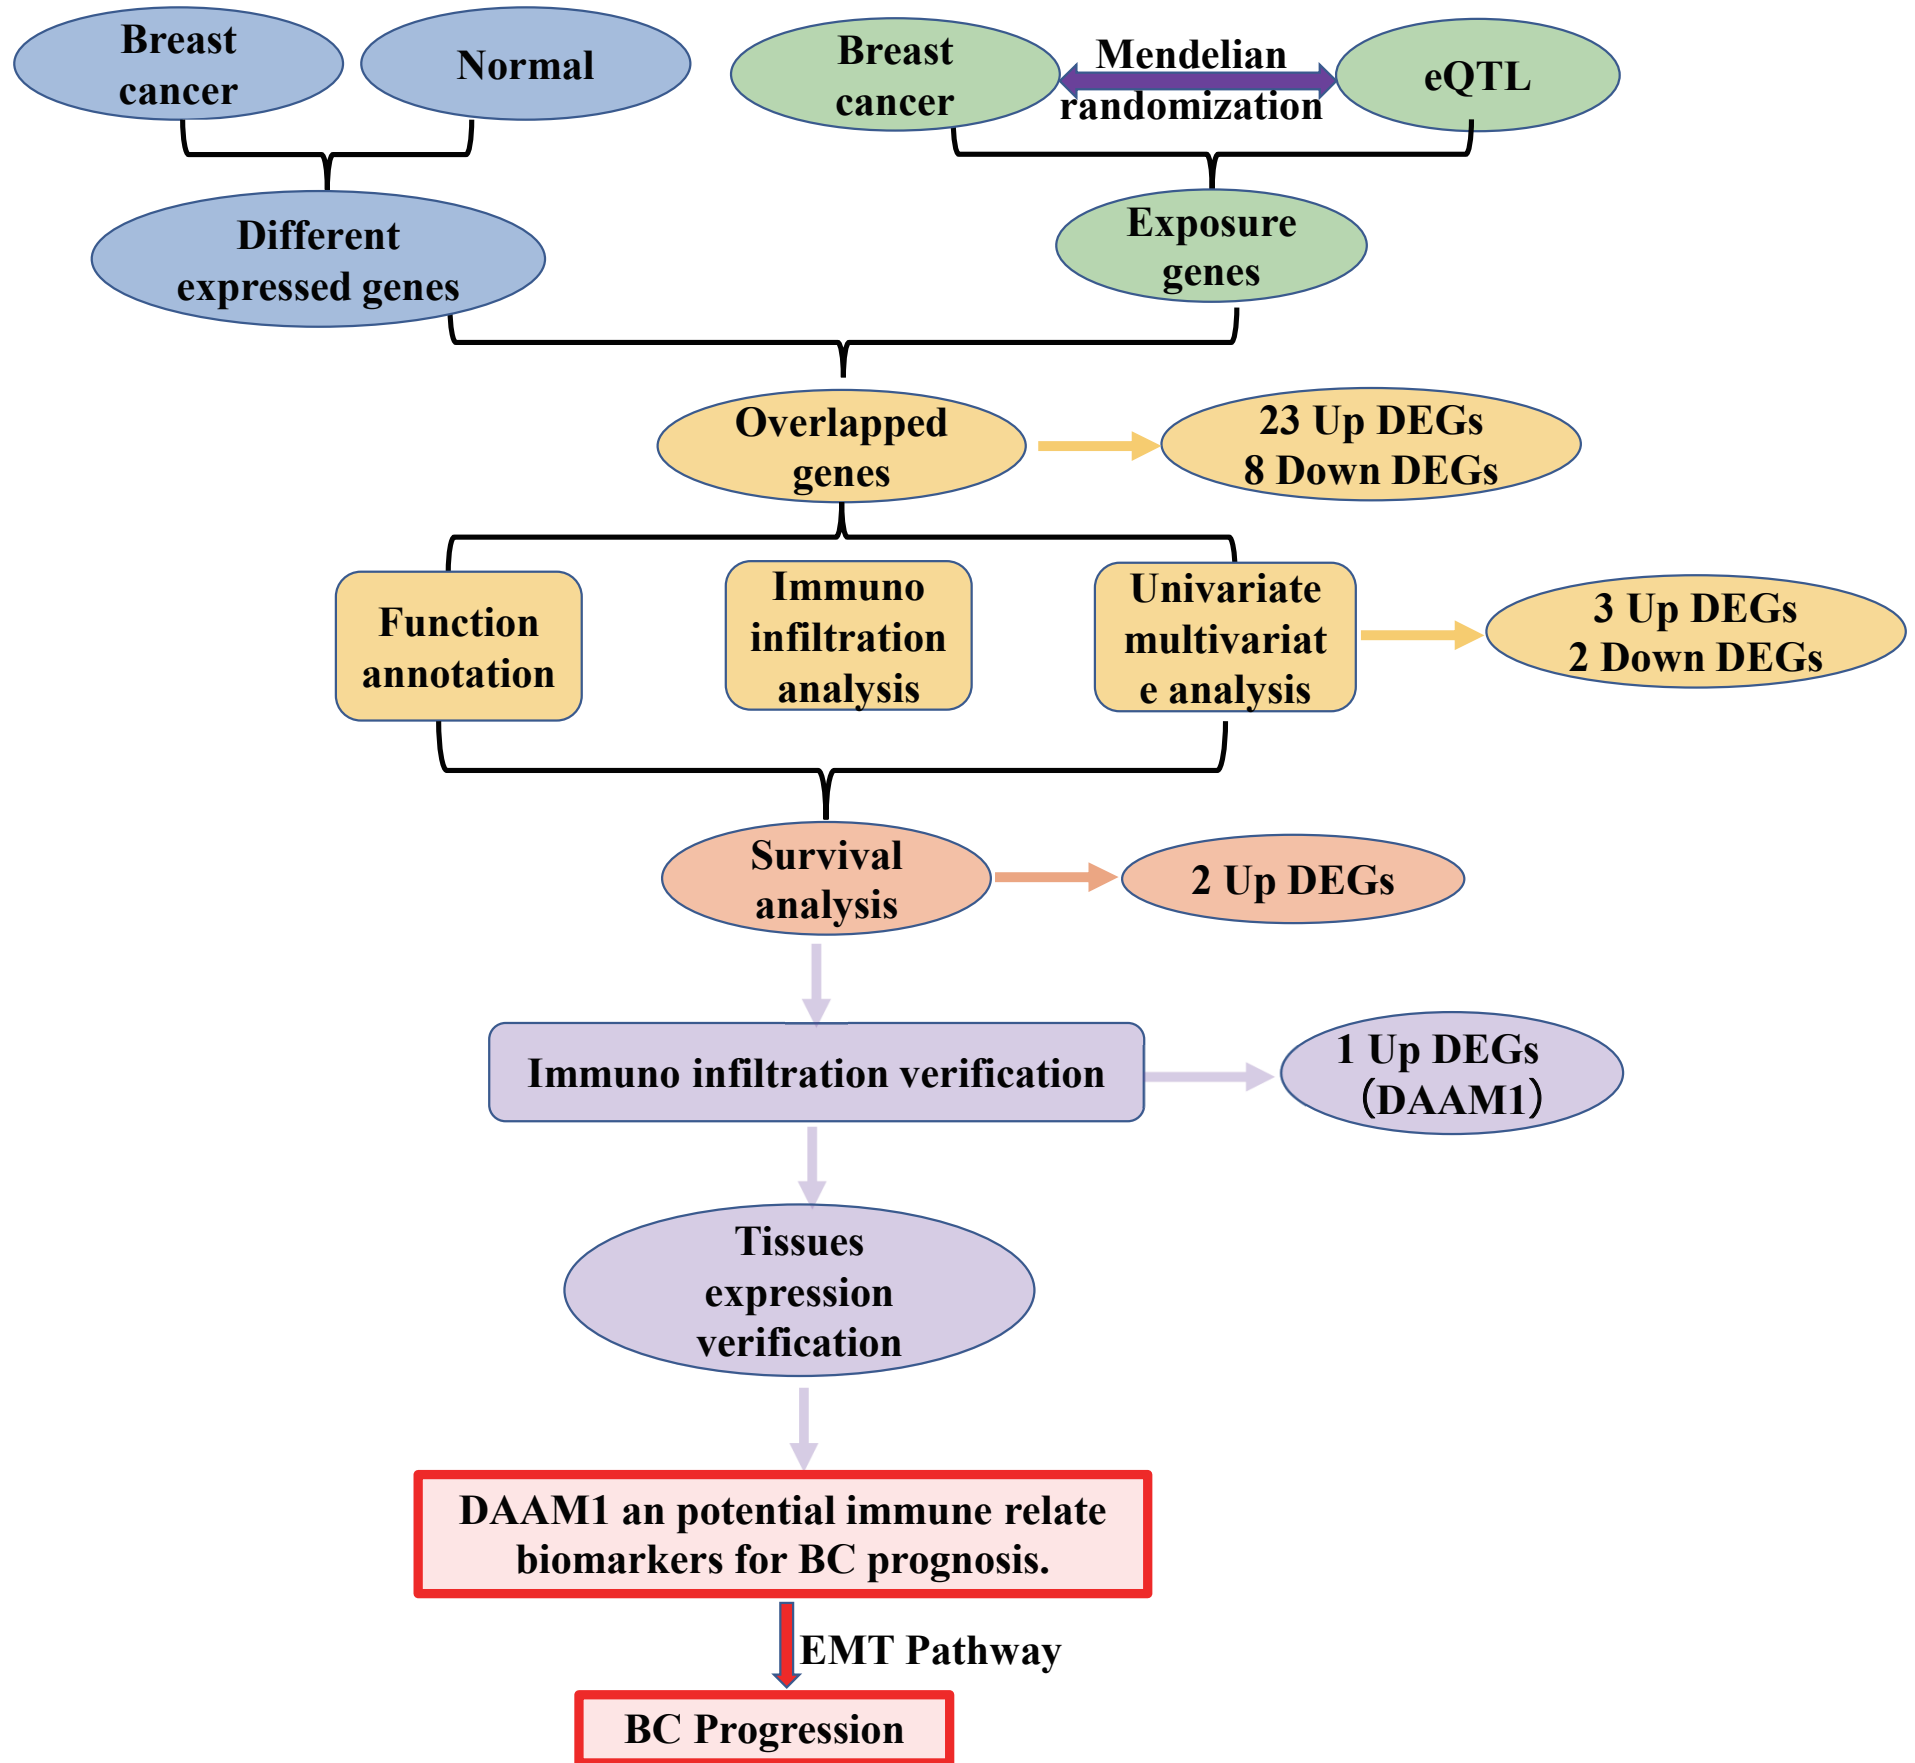

## Supplemental Figure S2. Identification of subtype-specific differentially expressed genes (DEGs).

(A-D) Volcano plots displaying DEGs between each BC subtype (Basal, HER2+, Luminal A, Luminal B) and normal breast tissues.

**A**

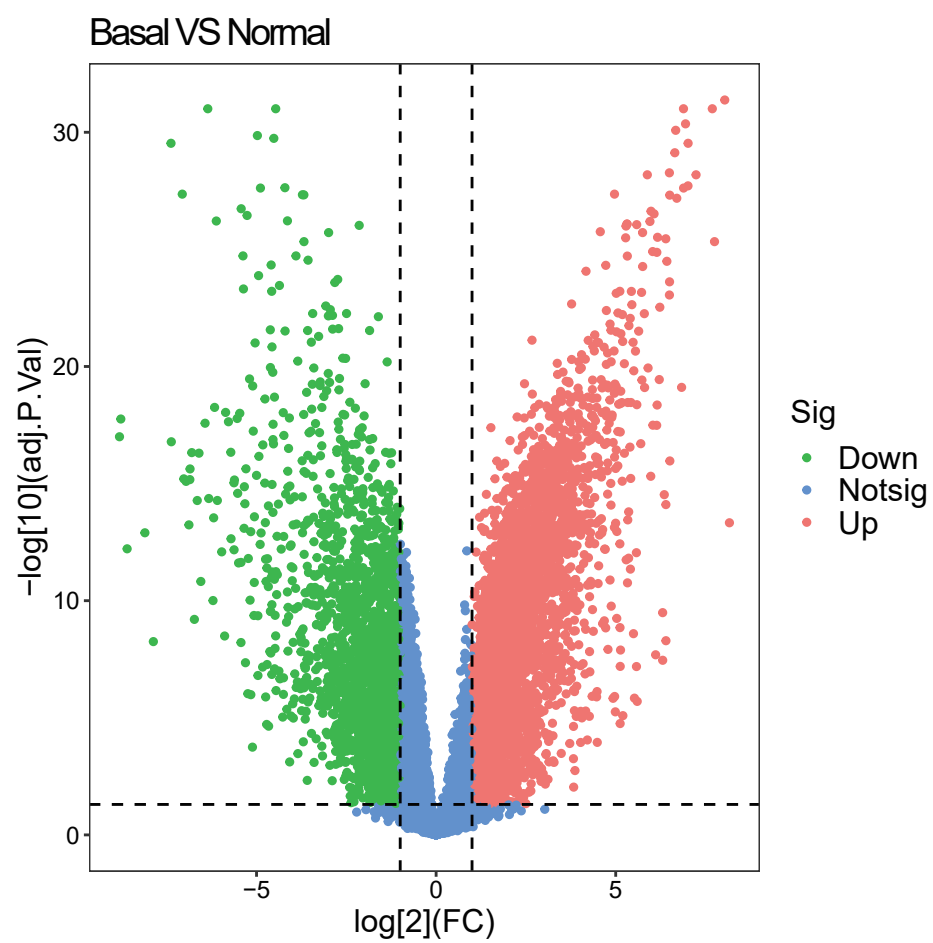

**B**

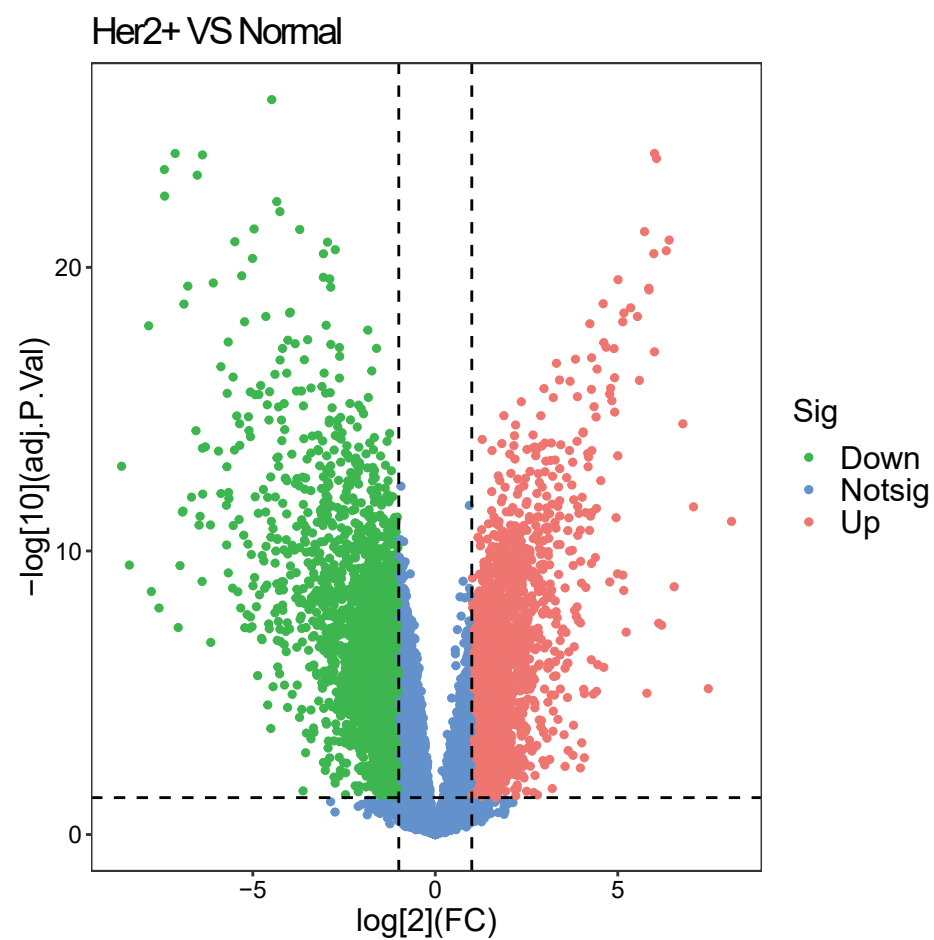

**C**

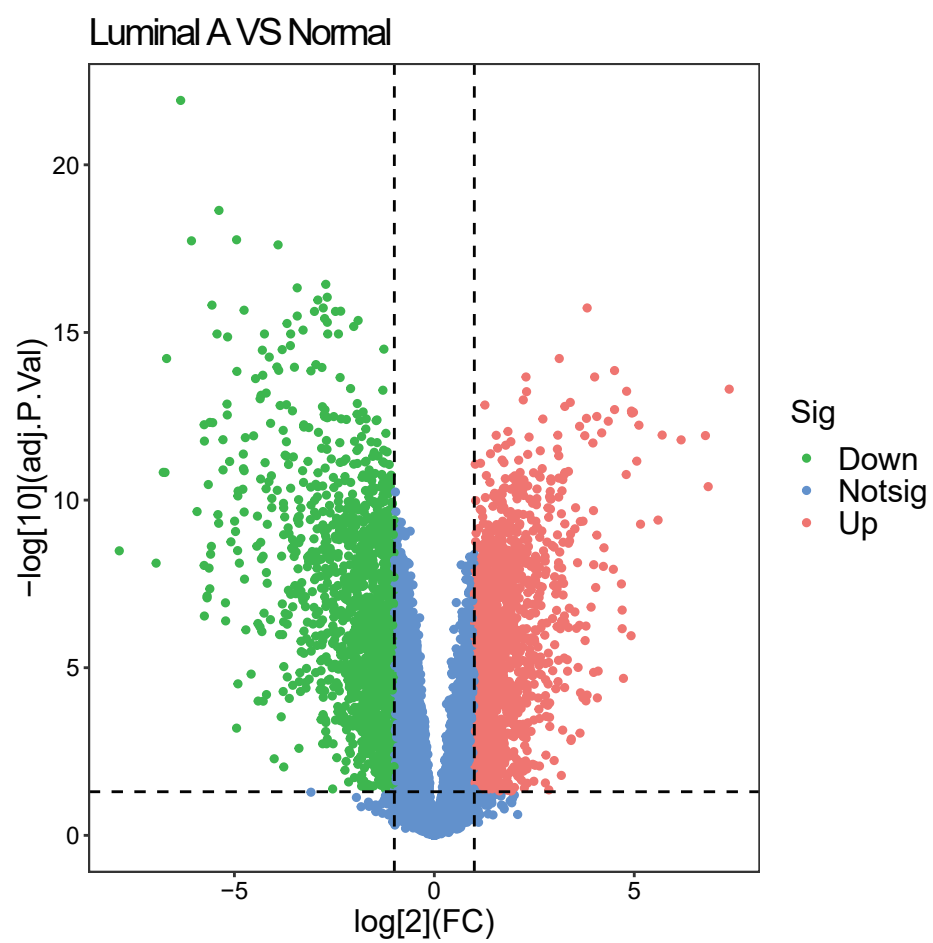

**D**

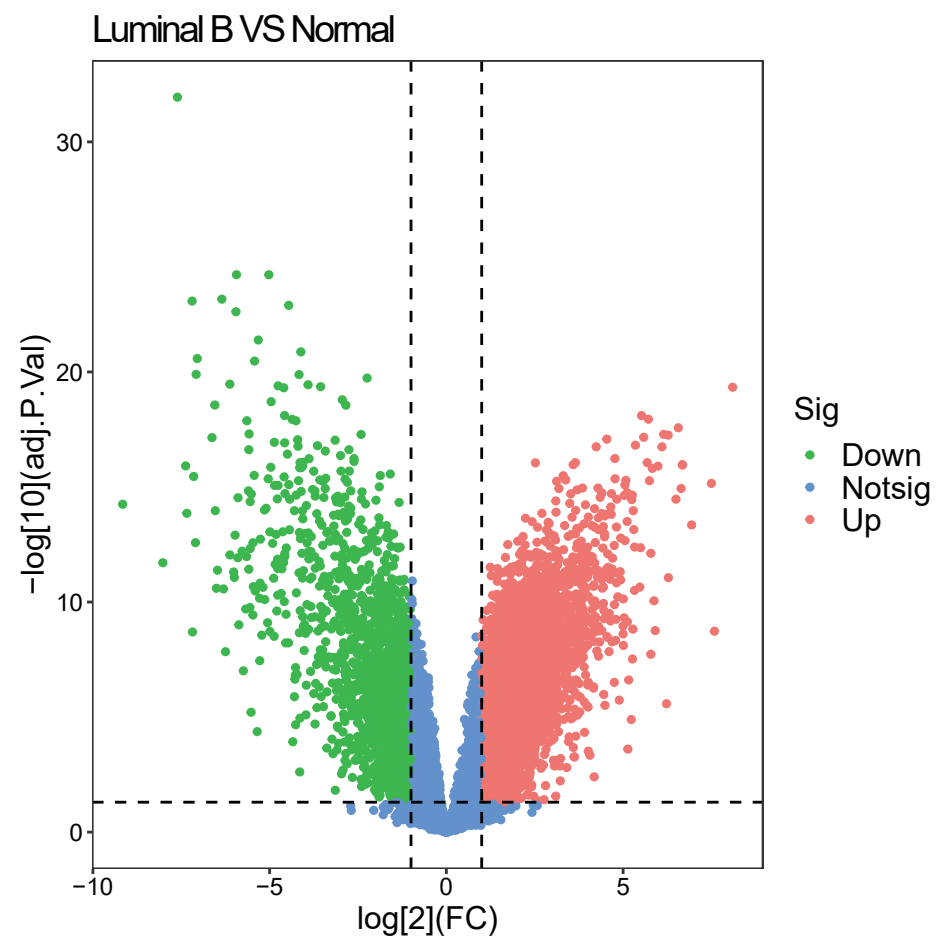

Supplement: Supplementary file 1 [file 569177_Supplement%20Figure_2.pdf]
